# Supplementary material for: Alzheimer's brains show inter-related changes in RNA and lipid metabolism
Source: PubMed Central journal article supplement — Neurobiol Dis. 2017 Oct;106:1–13. doi: 10.1016/j.nbd.2017.06.008 (PMC5560656; doi:10.1016/j.nbd.2017.06.008), 2017-10
Supplement: mmc1.pdf [file mmc1.pdf]

Supplementary figures and tables for

## Alzheimer's brains show inter-related changes in RNA and lipid metabolism

Shahar Barbash<sup>1,2</sup>, Benjamin P Garfinkel<sup>1,2</sup>, Rotem Maoz<sup>1,2</sup>, Alon Simchovitz<sup>2</sup>, Bettina Nadorp<sup>2,3</sup>, Alessandro Guffanti<sup>2</sup>, Estelle R. Bennett<sup>2</sup>, Courtney Nadeau<sup>4</sup>, Andreas Türk<sup>4</sup>, Lukas Paul<sup>4</sup>, Torsten Reda<sup>4</sup>, Yan Li<sup>5</sup>, Aron S. Buchman<sup>6</sup>, David S. Greenberg<sup>2</sup>, Alexander Seitz<sup>4</sup>, David A. Bennett<sup>6</sup>, Patrick Giavalisco<sup>5</sup>, and Hermona Soreq<sup>1,2\*</sup>

<sup>1</sup> The Edmond & Lily Safra Center for Brain Sciences, <sup>2</sup>The Department of Biological Chemistry and <sup>3</sup>The Grass Center for Bioengineering, The Hebrew University of Jerusalem, Jerusalem 91904, Israel.

<sup>4</sup> Lexogen GmbH, Campus Vienna Biocenter 5, 1030 Vienna, Austria.

<sup>5</sup> Max Planck Institute of Molecular Plant Physiology, Am Mühlenberg 1, 14476 Potsdam-Golm, Germany.

<sup>6</sup> Rush Alzheimer's Disease Center, Rush University Medical Center, 600 South Paulina, Suite 1028, Chicago, IL 60612, USA.

\*Correspondence to Hermona Soreq

Email: [hermona.soreq@mail.huji.ac.il](mailto:hermona.soreq@mail.huji.ac.il)

### Supplementary Figures

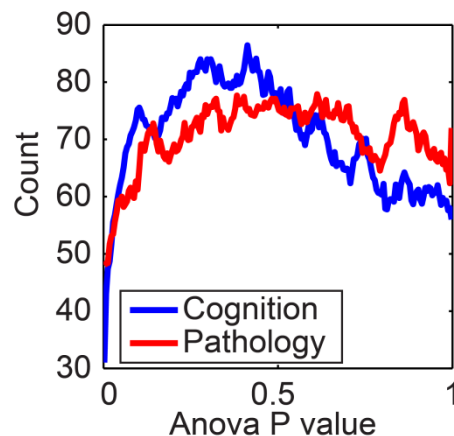

**Supplementary Figure 1: strong association with cognitive deterioration.** Sequencing data of the RUSH cohort was 2-Way-ANOVA analyzed with cognitive deterioration levels and pathology level being the two parameters. Shown are distributions of the 2-Way-ANOVA P values for each of the parameters.

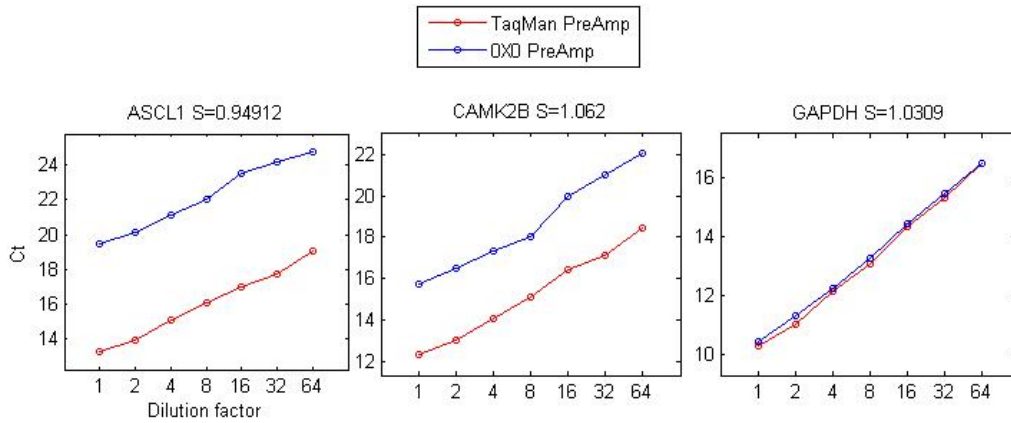

**Supplementary Figure 2:** Calibration curve for the ASCL1, CAMK2B and GAPDH genes which have been investigated in the Fluidigm RT experiment. The calculated slope,  $S$ , was 0.94912. The calculated slope for the calibration curves of the entire gene list is shown in Supplementary Table 3. Two cDNA synthesis reactions were examined; using a single universal primer from both 5' and 3' ends (OXO PreAmp; blue) and pooling the primers for the Fluidigm examined genes (TaqMan PreAmp; red).

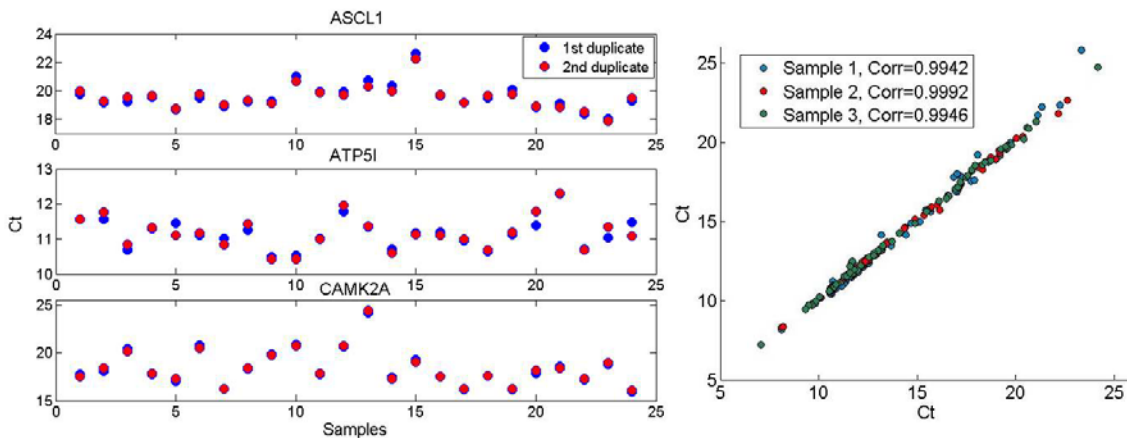

**Supplementary Figure 3:** Signal to noise in the Fluidigm system. Shown are technical duplicates from each of the 24 patients for three exemplary genes (left). The technical variance constitutes less than 1% of the biological variance between samples. For the first three samples the technical duplicates of all 65 validated genes are plotted in one scatter plot (right).

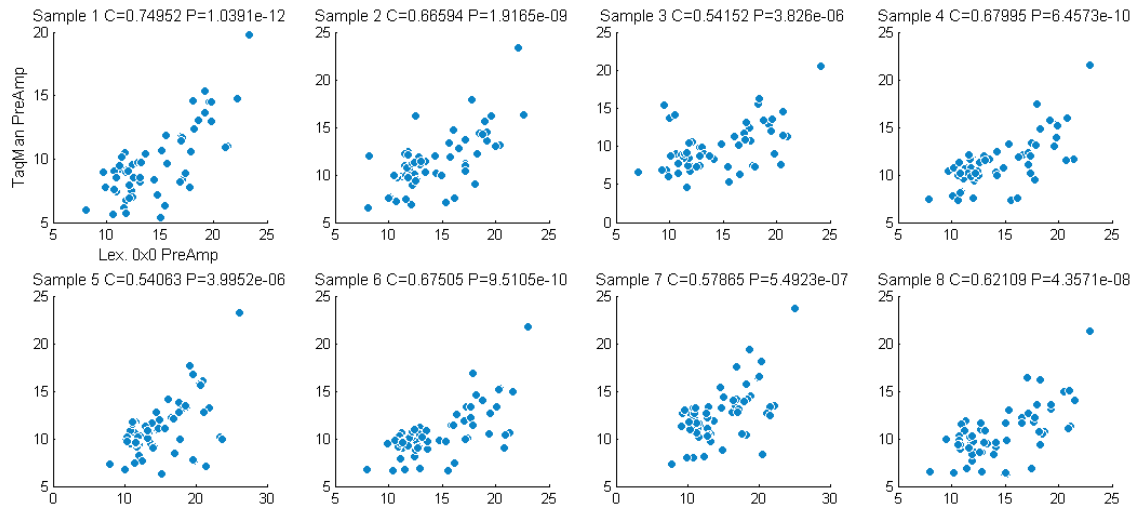

**Supplementary Figure 4:** High correlation between two methods of DNA pre-amplification. The DNA was amplified either with one universal primer pair or by pooling the primers of the 80 chosen genes and running 10 RT cycles. Shown are scatter plots for the threshold cycle, ct, of the RT reaction for 65 genes for each Control sample separately and the correlation coefficient and P value for each sample.

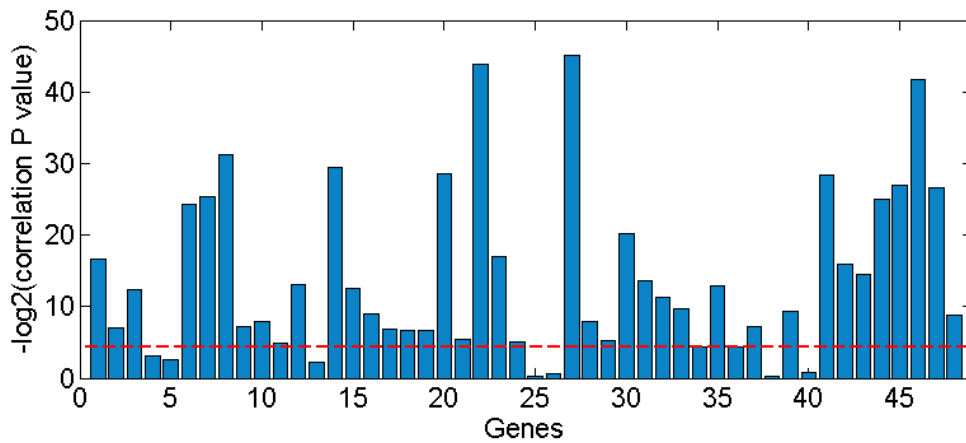

**Supplementary Figure 5:** Correlation P values ( $-\log_2$  scale) for gene expression measured by the SQUARE sequencing and the Fluidigm system. Red line marks significant level of 0.05.

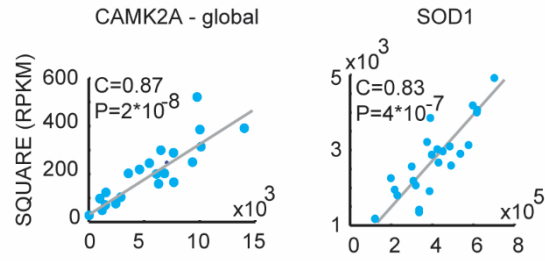

**Supplementary Figure 6:** SQUARE sequencing results (Y axis, RPKM) show high correlation to Fluidigm RT-PCR measurements (X axis, arbitrary units; A.U., delta-delta-CT normalized) for global gene expression of the CAMK2A gene and for the known distal and proximal 3'UTR variants of SOD1.

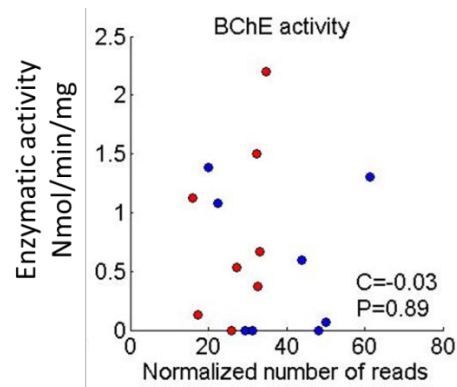

**Supplementary Figure 7:** Scatter plot of butyrylcholinesterase (BChE) enzymatic activity (Y axis) and normalized number of reads (X axis) shows no correlation between the two measures.

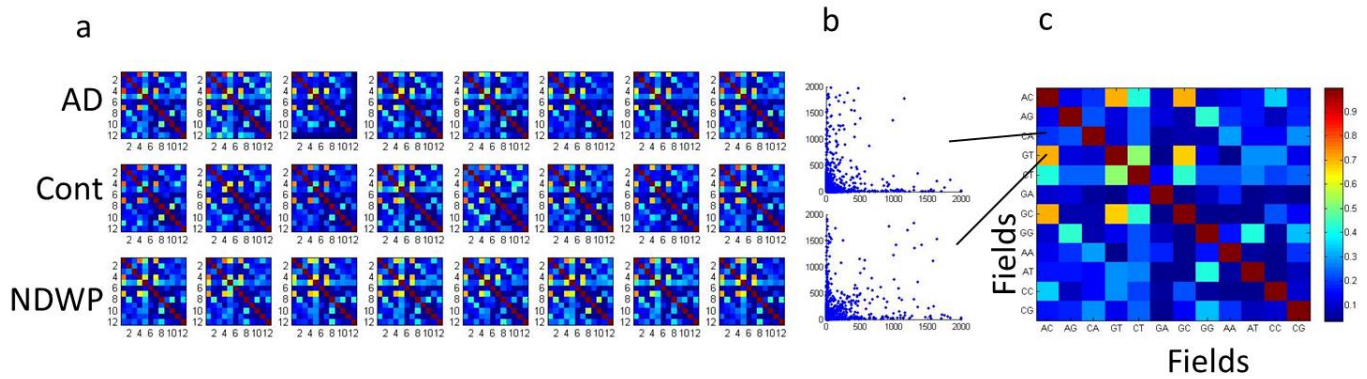

**Supplementary Figure 8:** No correlation between SQUARE fields. Shown are correlation matrices between the different SQUARE fields, across all genes, for each patient separately (a) and averaged across the patient cohort (c). Shown in (b) are two examples of a scatter plot of expression for all genes in two fields, AC compared to CA (upper graph) and AC compared to GT (lower graph). Color bar on the right represents correlation coefficient from 0 to 1.

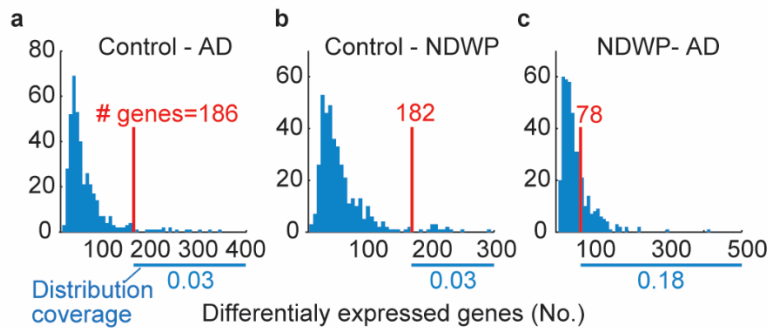

**Supplementary Figure 9:** Number of iterations in which specified numbers of differentially expressed genes were identified in SQUARE field 'AC' (see Supplemental Table 4 for all fields' analyses). Note the distinct comparisons of distributions coverage for the controls vs. AD (a), controls vs. NDWP (b) and NDWP vs. AD cohorts (c).

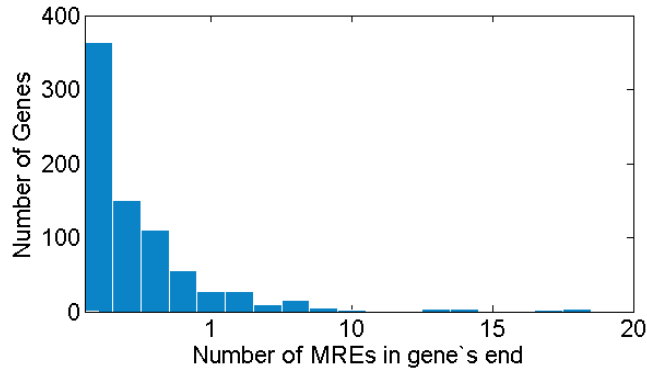

**Supplementary Figure 10:** Histogram showing numbers of genes with different numbers of detected MREs overlapping the region of 5 nucleotides upstream of the putative distal poly(A) site. MREs were identified with the microT prediction algorithm.

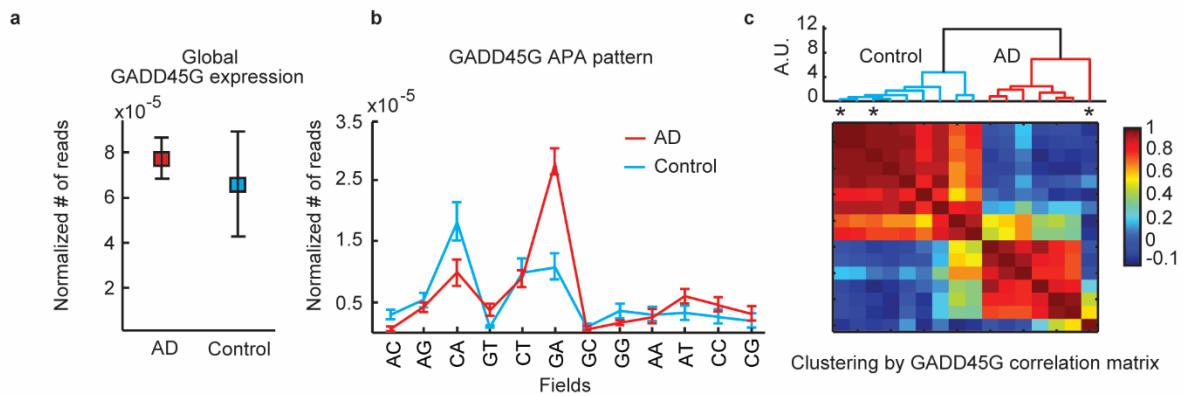

**Supplementary Figure 11:** (a) Expression levels of GADD45G in AD patients and controls. (b) APA pattern of GADD45G in AD (1) and controls (blue). Shown are averages  $\pm$  SEM of expression in each SQUARE field in the patient groups, note switch between the proximal and distal products from controls to AD. Fields 'CA' and 'GA', but none of the others neither the global transcript counts show significant change. (c) APA ratio correlation matrix for the GADD45G gene in AD and controls.

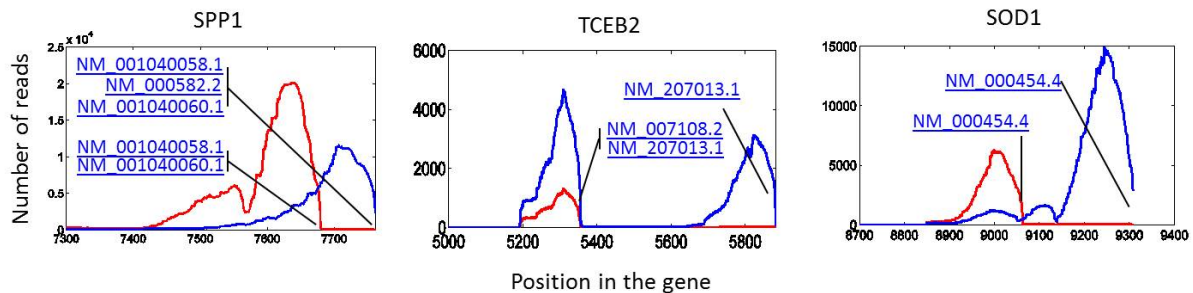

**Supplementary Figure 12:** Read distribution in the 3'UTR of the two major SQUARE fields for the SPP1, TCEB2 and SOD1 genes. Also shown are the RefSeq IDs of the APA variants.

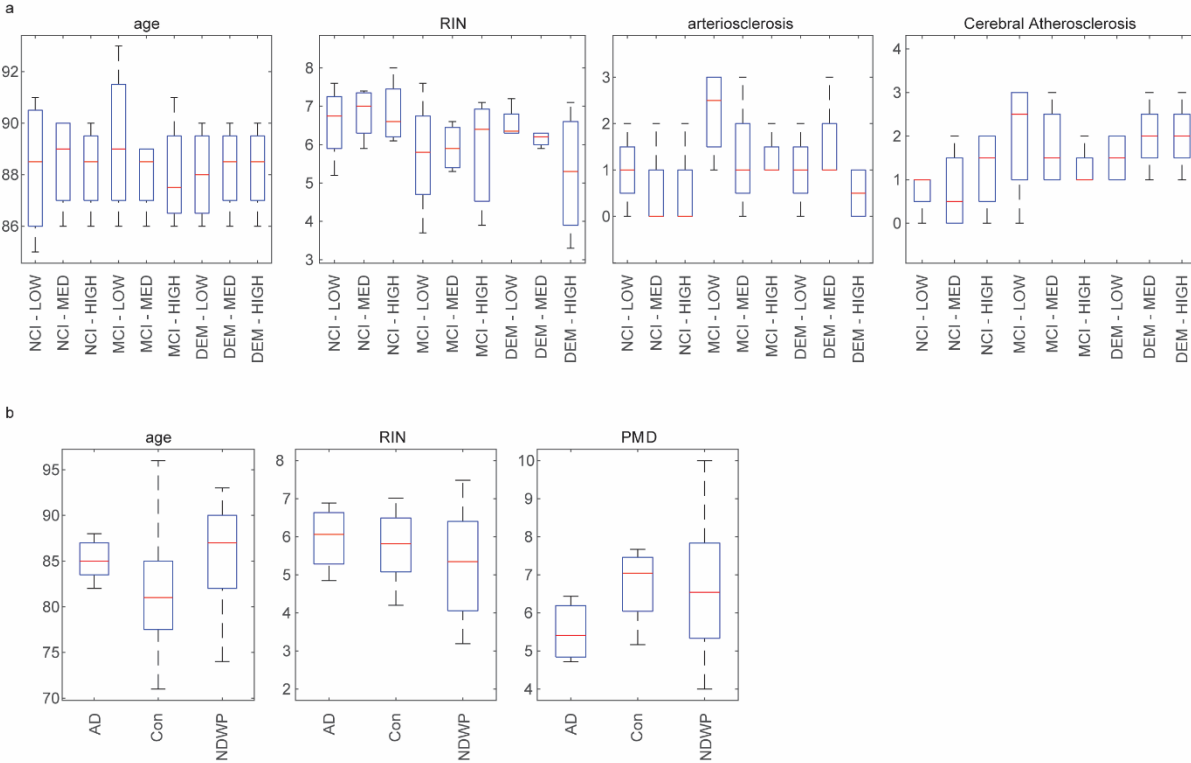

**Supplementary Figure 13:** Boxplot showing median (red line), 25<sup>th</sup> and 75<sup>th</sup> percentiles (box edges) and 2 standard deviations (whiskers) of measured confounders across the patient groups for available sample parameters for the 36 human sample cohort (a) and the 24 human sample cohort (b). Confounders include age, RNA integrity number (RIN), post mortem delay (PMD) and the risk factors Arteriosclerosis and Cerebral Atherosclerosis as measured by Buchman et. al. (2).

*Supplementary Tables*

**Supplementary Table 1:** Full data on first cohort (n=36, RUSH) of human brain samples from which total RNA was extracted and sequenced. Cognitive State shown in 'group', NCI=no cognitive impairments, MCI=mild cognitive impairments, DEM=demented. 'Low', 'MED' and 'HIGH' refers to low, medium and high Braak staging. Arteriosclerosis: describes the histological changes commonly found in the small vessels of the brain in aging.

| index | group     | Braak | Age of death | Arteriosclerosis | Cerebral Atherosclerosis |
|-------|-----------|-------|--------------|------------------|--------------------------|
| 1     | MCI - LOW | 1     | 90           | 3.0              | 3.0                      |
| 2     | NCI - MED | 4     | 90           | 0.0              | 0.0                      |

|    |            |   |    |     |     |
|----|------------|---|----|-----|-----|
| 3  | DEM - HIGH | 5 | 89 | 1.0 | 3.0 |
| 4  | NCI - HIGH | 5 | 90 | 0.0 | 2.0 |
| 5  | NCI - HIGH | 5 | 89 | 0.0 | 1.0 |
| 6  | NCI - MED  | 3 | 88 | 2.0 | 2.0 |
| 7  | MCI - MED  | 4 | 89 | 0.0 | 1.0 |
| 8  | DEM - MED  | 3 | 89 | 1.0 | 2.0 |
| 9  | NCI - LOW  | 2 | 91 | 1.0 | 1.0 |
| 10 | NCI - MED  | 4 | 86 | 0.0 | 0.0 |
| 11 | DEM - HIGH | 5 | 90 | 0.0 | 2.0 |
| 12 | DEM - HIGH | 5 | 86 | 1.0 | 2.0 |
| 13 | MCI - HIGH | 5 | 87 | 2.0 | 1.0 |
| 14 | DEM - LOW  | 2 | 87 | 1.0 | 1.0 |
| 15 | NCI - HIGH | 5 | 86 | 2.0 | 2.0 |
| 16 | MCI - HIGH | 5 | 86 | 1.0 | 1.0 |
| 17 | DEM - LOW  | 1 | 89 | 0.0 | 1.0 |
| 18 | NCI - LOW  | 2 | 87 | 2.0 | 1.0 |
| 19 | DEM - MED  | 4 | 90 | 1.0 | 3.0 |
| 20 | DEM - MED  | 3 | 86 | 1.0 | 2.0 |
| 21 | MCI - MED  | 4 | 88 | 1.0 | 1.0 |
| 22 | DEM - MED  | 3 | 88 | 3.0 | 1.0 |
| 23 | NCI - LOW  | 2 | 90 | 0.0 | 1.0 |
| 24 | MCI - LOW  | 1 | 86 | 3.0 | 3.0 |
| 25 | DEM - LOW  | 1 | 86 | 1.0 | 2.0 |
| 26 | MCI - LOW  | 2 | 88 | 2.0 | 0.0 |
| 27 | MCI - LOW  | 2 | 93 | 1.0 | 2.0 |
| 28 | DEM - LOW  | 2 | 90 | 2.0 | 2.0 |
| 29 | MCI - MED  | 4 | 89 | 3.0 | 3.0 |
| 30 | MCI - HIGH | 5 | 91 | 1.0 | 1.0 |
| 31 | NCI - LOW  | 1 | 85 | 1.0 | 0.0 |
| 32 | DEM - HIGH | 5 | 88 | 0.0 | 1.0 |
| 33 | NCI - MED  | 3 | 90 | 0.0 | 1.0 |
| 34 | NCI - HIGH | 5 | 88 | 0.0 | 0.0 |
| 35 | MCI - MED  | 3 | 86 | 1.0 | 2.0 |
| 36 | MCI - HIGH | 5 | 88 | 1.0 | 2.0 |

**Supplementary Table 2:** Full data on the second cohort (n=24, NBB) of human brain samples from which total RNA was extracted and sequenced.

| nbb id   | autopsy | sex | age | pmd   | ph   | weight | region                    | storage           |
|----------|---------|-----|-----|-------|------|--------|---------------------------|-------------------|
| 2008-047 | S08/132 | M   | 77  | 06:35 | 6.10 | 1250   | superior temporalis gyrus | plastic bag -80°C |
| 2000-066 | S00/141 | M   | 80  | 04:20 | 7.08 | 1160   | inferior temporalis gyrus | plastic bag -80°C |



|                 |         |   |    |       |      |      |                           |                   |
|-----------------|---------|---|----|-------|------|------|---------------------------|-------------------|
| <b>2007-025</b> | S07/107 | M | 82 | 05:15 | 6.34 | 1182 | superior temporalis gyrus | plastic bag -80°C |
| <b>2007-052</b> | S07/197 | M | 82 | 04:15 | 6.41 | 1205 | medial temporalis gyrus   | plastic bag -80°C |
| <b>2009-040</b> | S09/129 | M | 83 | 06:10 | 5.91 | 1102 | superior temporalis gyrus | plastic bag -80°C |
| <b>2008-029</b> | S08/085 | M | 84 | 08:05 | 5.95 | 1195 | superior temporalis gyrus | plastic bag -80°C |
| <b>2001-044</b> | S01/110 | M | 85 | 04:25 | 6.20 | 1383 | superior temporalis gyrus | plastic bag -80°C |
| <b>2001-063</b> | S01/145 | M | 85 | 04:45 | 6.38 | 1215 | superior temporalis gyrus | plastic bag -80°C |
| <b>2010-016</b> | S10/036 | M | 86 | 06:15 | ?    | 1211 | superior temporalis gyrus | plastic bag -80°C |
| <b>2009-107</b> | S09/324 | M | 88 | 04:40 | 6.22 | 1054 | superior temporalis gyrus | plastic bag -80°C |
| <b>2005-010</b> | S05/039 | M | 93 | 04:30 | 6.46 | 1040 | superior temporalis gyrus | plastic bag -80°C |
| <b>2002-087</b> | S02/258 | M | 71 | 07:40 | 6.20 | 1150 | superior temporalis gyrus | plastic bag -80°C |
| <b>2001-016</b> | S01/054 | M | 77 | 08:25 | 7.19 | 1118 | superior temporalis gyrus | plastic bag -80°C |
| <b>2000-015</b> | S00/034 | M | 78 | 05:35 | 6.63 | 1417 | inferior temporalis gyrus | cryovial -80°C    |
| <b>2005-044</b> | S05/159 | M | 80 | 07:15 | 5.80 | 1331 | superior temporalis gyrus | plastic bag -80°C |
| <b>2001-021</b> | S01/064 | M | 82 | 07:40 | 6.07 | 1318 | inferior temporalis gyrus | plastic bag -80°C |
| <b>2009-005</b> | S09/009 | M | 82 | 05:10 | 6.75 | 1087 | superior temporalis gyrus | plastic bag -80°C |
| <b>2001-086</b> | S01/194 | M | 88 | 07:00 | 6.84 | 1368 | superior temporalis gyrus | plastic bag -80°C |
| <b>2003-035</b> | S03/084 | M | 96 | 06:30 | 6.65 | 1300 | superior temporalis gyrus | plastic bag -80°C |
| <b>2005-019</b> | S05/072 | M | 74 | 05:00 | 6.70 | 1115 | superior temporalis gyrus | plastic bag -80°C |
| <b>2003-084</b> | S03/254 | M | 82 | 10:00 | 6.53 | 1488 | superior temporalis gyrus | plastic bag -80°C |
| <b>2009-039</b> | S09/128 | M | 82 | 12:55 | 6.21 | 1406 | superior temporalis gyrus | plastic bag -80°C |
| <b>2005-073</b> | S05/269 | M | 87 | 06:05 | 6.96 | 1468 | superior temporalis gyrus | plastic bag -80°C |
| <b>2009-075</b> | S09/244 | M | 88 | 07:00 | 6.76 | 1230 | superior temporalis gyrus | plastic bag -80°C |

**Supplementary Table 3: Full enrichment analysis results. Linked to Figure 2a.**

|           |                                        | P value  | % gene |
|-----------|----------------------------------------|----------|--------|
| Cognition | Organelle luman                        | 3.39E-05 | 8.1    |
|           | Proteinlocalization and transoprt      | 2.95E-04 | 11     |
|           | Translation                            | 4.37E-04 | 17     |
|           | Mitochondrion                          | 1.00E-03 | 10     |
|           | GTP binding and activity               | 0.0046   | 5.5    |
|           | Golgi                                  | 0.0089   | 4.3    |
|           | Apoptosis                              | 0.01     | 8.8    |
|           | Cytoskeleton                           | 0.012    | 8.1    |
|           | RNA processing                         | 0.0123   | 16     |
|           | Lipid synthesis                        | 0.0182   | 5.2    |
|           |                                        |          |        |
| Patholgy  | Ion binding                            | 1.00E-03 | 3      |
|           | Plecksterin homology                   | 0.01     | 2.2    |
|           | Cell adhesion                          | 0.0148   | 4.2    |
|           | Positive regulation of immune response | 0.017    | 2.1    |
|           | Secretion by cell                      | 0.0309   | 2.1    |
|           | Cytoskeleton organization              | 0.05     | 1.4    |

**Supplementary Table 4:** P values of statistical significant genes in the 2-Way-ANOVA model, separately for the parameters 'cognition' and 'pathology'. Attached as an excel file.

**Supplementary Table 5:** primer design for assessing gene expression in the Fluidigm system.

|    | gene            | sequence 5' to 3'        |
|----|-----------------|--------------------------|
| 1  | ALDOC-L         | GAAGGCAGTGGAGAAGATGG     |
| 2  | ALDOC-R         | CAGCAATGAGAGAGGGGAAG     |
| 3  | ATP5I-L         | TACCTAAAACCTCGGGCAGA     |
| 4  | ATP5I-R         | TTTATTCATCCGCTGCTGGT     |
| 5  | MT1F-L          | TCCTGCAAGTGCAAAGAGTG     |
| 6  | MT1F-R          | GCAAATGGGTCAAGGTGGTA     |
| 7  | PINK1-L         | CTGGAGTGTGAAACGCTCTG     |
| 8  | PINK1-R         | TCTCTGCGCTGTCTTGTCTC     |
| 9  | APOE-L          | ACGAGGTGAAGGAGCAGGT      |
| 10 | APOE-R          | GCTGCATGTCTTCCACCAG      |
| 11 | MAPT-L          | CATGCCTCCCTAAGACCTTG     |
| 12 | MAPT-R          | CCTCGTGGCTTTACTTGGAG     |
| 13 | Proximal SOD1-L | AGAAAACACGGTGGGCCAAA     |
| 14 | Proximal SOD1-R | TTTTTCCACCAGTGTGCGGCCAAT |
| 15 | Distal SOD1-L   | TTGTGTGACTTTTTAGAGTTGC   |
| 16 | Distal SOD1-R   | TTCACAGGCTTGAATGACAAA    |
| 17 | SPP1-L          | GCTTCATGGAAACTCCCTGT     |
| 18 | SPP1-R          | TCACACCACAAAAAGATAATCACA |
| 19 | CAMK2A-L        | TTCATTGGCTGACACACCTC     |

|    |            |                             |
|----|------------|-----------------------------|
| 20 | CAMK2A-R   | TTTGTCTGGTGAGGGTAGGC        |
| 21 | TMSB10-L   | CCACAAGCTGCACTGTGAAC        |
| 22 | TMSB10-R   | TGCCACGAGGTGTGTTTTAT        |
| 23 | CST3-L     | ATTCCCACCCCTGGACTG          |
| 24 | CST3-R     | ACACCGGGGCTATGAGAAG         |
| 25 | COX5B-L    | CAGCTGGCACACTGAGCAC         |
| 26 | COX5B-R    | TATGGGAGAAGGAGCCAATG        |
| 27 | FTL-L      | CGAAAGGCTCACTCTCAAGC        |
| 28 | FTL-R      | CATTTGGTCCAAGGCTTGTT        |
| 29 | HBB-L      | GGCTGCCTATCAGAAAGTGG        |
| 30 | HBB-R      | GATGCTCAAGGCCCTTCATA        |
| 31 | SEPW1-L    | TGTCCCGTGGTTTCATCATA        |
| 32 | SEPW1-R    | CAAACGTTGCCACAATCAGA        |
| 33 | MT3-L      | TGTGGAGCACGTGGAGATAG        |
| 34 | MT3-R      | GTCATTCTCCAAGGTCAGC         |
| 35 | MYL6-L     | CTGAATGGCTGAGGACCTTC        |
| 36 | MYL6-R     | GGCCCAGAGAGCAAGTTTATT       |
| 37 | ATP5I-L    | GGAGAGGAGGATAGCAGCAG        |
| 38 | ATP5I-R    | TCACACAACACAGGAAGCTTTA      |
| 39 | CRYAB-L    | AGCCCCAAGAAATAGATGC         |
| 40 | CRYAB-R    | TTGCTGAATGATATTTTATTAGCTTGA |
| 41 | MT2A-L     | GTGGGCTGTGCCAAGTGT          |
| 42 | MT2A-R     | ATAGCAAACGGTCACGGTCA        |
| 43 | RPL37A-L   | TGCCTGGACGTACAATACCA        |
| 44 | RPL37A-R   | GGCCAGTGATGTCTCAAAGAG       |
| 45 | S100B-L    | TTAAATGCGTTCCTCATCCA        |
| 46 | S100B-R    | TGCGAGTTCTGATGGAGTTG        |
| 47 | COX6B1-L   | GTCACAGACTGGGATGAGCA        |
| 48 | COX6B1-R   | TTCCAATGAGTTTTTATTAGCAGGT   |
| 49 | CKB-L      | TTCTCAGAGGTGGAGCTGGT        |
| 50 | CKB-R      | TACCAAGGGTGACGGAAGTC        |
| 51 | HIST1H4C-L | CGAGGTGTGCTTAAGGTTTTTC      |
| 52 | HIST1H4C-R | AGTTCTCAGGAGACCGCGTA        |
| 53 | MIF-L      | AGAACCGCTCCTACAGCAAG        |
| 54 | MIF-R      | ATTTCTCCCCACCAGAAGGT        |
| 55 | COX4I1-L   | CAAGAGGATGCTGGACATGA        |
| 56 | COX4I1-R   | TTTGGCATAACAGGTTTCCAG       |
| 57 | NDUFA3-L   | GCCCTACAACACTACCCAGTGC      |
| 58 | NDUFA3-R   | GGGGGTTGGTTTTTCACATTT       |
| 59 | RPL36-L    | CGCCATGGAGTTACTGAAGG        |
| 60 | RPL36-R    | GGAGGGGCTCAGTCTTTCTT        |
| 61 | GAPDH-L    | CGACCACTTTGTCAAGCTCA        |
| 62 | GAPDH-R    | AGGGGTCTACATGGCAACTG        |
| 63 | NDUFB8-L   | TGATCCCTCAAAGAACCAG         |
| 64 | NDUFB8-R   | TGAGGCACAAATAACACAGCA       |
| 65 | LGALS1-L   | ACGAATTCAAGTTCCCCAAC        |

|    |           |                            |
|----|-----------|----------------------------|
| 66 | LGALS1-R  | GCTGGCTGATTCAGTCAAAG       |
| 67 | UBL5-L    | TTAAGGACCACGTGTCTCTGG      |
| 68 | UBL5-R    | GGTGAGTTTTTACAAACAAGCATCT  |
| 69 | COX7C-L   | CCCTTCCTTGTAGTAAGACACCA    |
| 70 | COX7C-R   | AGTTTGATCCACTTCCAGAGG      |
| 71 | PTMA-L    | GATGGTTAAAAAGGCCAAAGA      |
| 72 | PTMA-R    | CATACATCAAACAGGCCAAAAA     |
| 73 | TUBB2A-L  | TCAATCGTGCATCCTTAGTGA      |
| 74 | TUBB2A-R  | GAGGCAAACTGAGCACCAT        |
| 75 | TMEM59L-L | CTAGGGCTTCCCCCTTCTC        |
| 76 | TMEM59L-R | ACGCTTTATAGGGGCATGG        |
| 77 | TYROBP-L  | CCTGCACCTCATTCCAATC        |
| 78 | TYROBP-R  | AGAGTATTGGGGAGCGGTCT       |
| 79 | DYNLRB1-L | ACTTCCAGTTTTGGAGCAA        |
| 80 | DYNLRB1-R | AAGGGCGACAAAGTGAAGT        |
| 81 | GNAS-L    | TAAGGCGGCCTACAGAAAAA       |
| 82 | GNAS-R    | TTTGTTTGCTGCTGCTGTTT       |
| 83 | TUBB3-R   | GCAACTACGTGGGCGACT         |
| 84 | TUBB3-L   | CGAGGCACGTACTTGTGAGA       |
| 85 | CAMK2B-R  | GAGCCATCCTCACCACCAT        |
| 86 | CAMK2B-L  | TATTCGTCTGGGGCTTGACT       |
| 87 | GPHN-R    | TTCAACAGAAGATAGTTCCTCATCAC |
| 88 | GPHN-L    | GGACTGGTGTAGAATGGATGC      |
| 89 | PPP1R1B-R | CACACCACCTTCGCTGAAA        |
| 90 | PPP1R1B-L | GAAGCTCCCCAGCTCAT          |
| 91 | PAX6-R    | GGCACACACACATTAACACACTT    |
| 92 | PAX6-L    | GGTGTGTGAGAGCAATTCTCAG     |
| 93 | TPM2-R    | GGAGAAAACCATCGATGACC       |
| 94 | TPM2-L    | CAAGGTCTGGTGAATCTCGAC      |
| 95 | ASCL1-R   | CGACTTCACCAACTGGTTCTG      |
| 96 | ASCL1-L   | ATGCAGGTTGTGCGATCA         |

**Supplementary Table 6:** Lipids, see attached excel file

**Supplementary Table 7:** Cell type specific genes in Ensemble annotation (3).

| Neurons         | Astrocytes      | Oligodendrocytes |
|-----------------|-----------------|------------------|
| ENSG00000132639 | ENSG00000121742 | ENSG00000234096  |
| ENSG00000186297 | ENSG00000182902 | ENSG00000197971  |
| ENSG00000125851 | ENSG00000100033 | ENSG00000128242  |
| ENSG00000152784 | ENSG00000141469 | ENSG00000148180  |
| ENSG00000182836 | ENSG00000171885 | ENSG00000101049  |
| ENSG00000147676 | ENSG00000080493 | ENSG00000054690  |

|                 |                 |                 |
|-----------------|-----------------|-----------------|
| ENSG00000081189 | ENSG00000103740 | ENSG00000164181 |
| ENSG00000146469 | ENSG00000164342 | ENSG00000164303 |
| ENSG00000101958 | ENSG00000211448 | ENSG00000065675 |
| ENSG00000124140 | ENSG00000198682 | ENSG00000103089 |
| ENSG00000144355 | ENSG00000144908 | ENSG00000135678 |
| ENSG00000164600 | ENSG00000119938 | ENSG00000123560 |
| ENSG00000165434 | ENSG00000145681 | ENSG00000065361 |
| ENSG00000119125 | ENSG00000163406 | ENSG00000013297 |
| ENSG00000186487 | ENSG00000138696 | ENSG00000064787 |
| ENSG00000155926 | ENSG00000109107 | ENSG00000198753 |
| ENSG00000122254 | ENSG00000219607 | ENSG00000184343 |
| ENSG00000104435 | ENSG00000153208 | ENSG00000172005 |
| ENSG00000147571 | ENSG00000137561 | ENSG00000126860 |
| ENSG00000067715 | ENSG00000101938 | ENSG00000110944 |
| ENSG00000135333 | ENSG00000079215 | ENSG00000105695 |
| ENSG00000147246 | ENSG00000162390 | ENSG00000116711 |
| ENSG00000119042 | ENSG00000111783 | ENSG00000134198 |
| ENSG00000133636 | ENSG00000148482 | ENSG00000168314 |
| ENSG00000091664 | ENSG00000018625 | ENSG00000180929 |
| ENSG00000022355 | ENSG00000100427 | ENSG00000167641 |
| ENSG00000113327 | ENSG00000146070 |                 |
| ENSG00000104327 | ENSG00000117525 |                 |
| ENSG00000171951 | ENSG00000180340 |                 |
| ENSG00000145934 | ENSG00000110436 |                 |
| ENSG00000174576 | ENSG00000131095 |                 |
| ENSG00000136999 |                 |                 |
| ENSG00000181656 |                 |                 |
| ENSG00000180616 |                 |                 |

**Supplementary Table 8:** Cell type specific genes (4)

| <b>Astrocytes</b>  | <b>Microglia</b>   | <b>Neurons</b>     | <b>Oligodendrocytes</b> |
|--------------------|--------------------|--------------------|-------------------------|
| ENSG00000103740.9  | ENSG00000132965.9  | ENSG00000070808.15 | ENSG00000141338.13      |
| ENSG00000135744.7  | ENSG00000173372.16 | ENSG00000187094.11 | ENSG00000092529.22      |
| ENSG00000171885.13 | ENSG00000125730.16 | ENSG00000101489.18 | ENSG00000172508.10      |
| ENSG00000127249.14 | ENSG00000171860.4  | ENSG00000089199.9  | ENSG00000013297.10      |
| ENSG00000138696.10 | ENSG00000277632.1  | ENSG00000122966.13 | ENSG00000150656.14      |
| ENSG00000068078.17 | ENSG00000275302.1  | ENSG00000237289.9  | ENSG00000244274.7       |
| ENSG00000131095.11 | ENSG00000143119.12 | ENSG00000106976.18 | ENSG00000136960.12      |

|                    |                    |                    |                    |
|--------------------|--------------------|--------------------|--------------------|
| ENSG00000152661.7  | ENSG00000019582.14 | ENSG00000022355.14 | ENSG00000136541.14 |
| ENSG00000121742.15 | ENSG00000073737.16 | ENSG00000145864.12 | ENSG00000086205.16 |
| ENSG00000170075.8  | ENSG00000203747.9  | ENSG00000113327.14 | ENSG00000169562.9  |
| ENSG00000008394.12 | ENSG00000169508.6  | ENSG00000184368.15 | ENSG00000164161.9  |
| ENSG00000100033.16 | ENSG00000125538.11 | ENSG00000214548.14 | ENSG00000167755.13 |
| ENSG00000164188.8  | ENSG00000140678.16 | ENSG00000021645.17 | ENSG00000198121.13 |
| ENSG00000124145.6  | ENSG00000162511.7  | ENSG00000171951.4  | ENSG00000105695.14 |
| ENSG00000144040.12 | ENSG00000136167.13 | ENSG00000132639.12 | ENSG00000168314.17 |
| ENSG00000182902.13 | ENSG00000186818.12 | ENSG00000163630.10 | ENSG00000197430.10 |
| ENSG00000148482.11 | ENSG00000038945.14 | ENSG00000154096.13 | ENSG00000129538.13 |
| ENSG00000080493.13 | ENSG00000173391.8  | ENSG00000166448.14 | ENSG00000091513.14 |
| ENSG00000139155.8  | ENSG00000115956.9  | ENSG00000144406.18 | ENSG00000164124.10 |
|                    | ENSG00000081237.18 | ENSG00000163032.11 | ENSG00000174607.10 |
|                    | ENSG00000148908.14 |                    |                    |

**Supplementary Table 9:** Permutation based P value for general gene differential expression for all SQUARE fields, as shown for field 'AC' in Figure 6.

| Primers | Permutation P value |              |             |
|---------|---------------------|--------------|-------------|
|         | AD-<br>Con          | NDWP-<br>Con | AD-<br>NDWP |
| AC      | 0.03                | 0.03         | 0.18        |
| AG      | 0.05                | 0.06         | 0.46        |
| CA      | 0.07                | 0.08         | 0.2         |
| GT      | 0.03                | 0.02         | 0.16        |
| CT      | 0.09                | 0.08         | 0.28        |
| GA      | 0.07                | 0.08         | 0.1         |
| GC      | 0.02                | 0.02         | 0.06        |
| GG      | 0.01                | 0.01         | 0.06        |
| AA      | 0.01                | 0.07         | 0.08        |
| AT      | 0.01                | 0.01         | 0.05        |
| CC      | 0.02                | 0.03         | 0.11        |
| CG      | 0.07                | 0.01         | 0.07        |

**Supplementary Table 10:** Full gene lists for each of the identified profiles. Attached as an excel file.

**Supplementary Table 11:** Association of genes of profile 3 with human diseases. Listed are genes that showed an AD-specific up-regulation, their association with disease and a targeting FDA-approved drug if exist.

|    | <i>Gene</i> | <i>Variant ending dinucleotide</i> | <i>Disease</i>                                                                    | <i>Role</i>                                 | <i>FDA-approved Drug</i>                     | <i>reference</i> |
|----|-------------|------------------------------------|-----------------------------------------------------------------------------------|---------------------------------------------|----------------------------------------------|------------------|
| 1  | HLA-DRA     | CC                                 | Multiple sclerosis                                                                | Antigen presenting                          | Glatiramer Acetate                           | (5)              |
| 2  | P2RY12      | AG                                 | Coronary artery disease, peripheral vascular disease, and cerebrovascular disease | Blood clotting                              | Clopidogrel                                  | (6)              |
| 3  | S100A4      | CA                                 | Metastatic disease                                                                | cell cycle progression and differentiation  | Phenothiazines                               | (7)              |
| 4  | TBXAS1      | CC                                 | Hemostasis, cardiovascular disease, and stroke                                    | Lipid processing                            | Dipyridamole, Picotamide                     | (8)              |
| 5  | SLC6A9      | GA                                 | Schizophrenia and cognitive disorders                                             | NMDA potentiation                           | ASP2535<br>Bitopertin<br>RG1678<br>Org 25935 | (9)              |
| 6  | LCAT        | AC                                 | LCAT deficiency syndromes, Alzheimer`s disease                                    | Cholesterol processing                      | --                                           | (10)             |
| 7  | MT1F        | CA                                 | Parkinson                                                                         | Metal storage, transport and detoxification | --                                           | (11)             |
| 8  | MT1G        | CA                                 | Parkinson                                                                         | Metal storage, transport and detoxification | --                                           | (12)             |
| 9  | CLINT1      | GA                                 | Schizophrenia                                                                     | Cell development                            | --                                           | (13)             |
| 10 | SPP1        | AC                                 | Autoimmune diseases, Multiple sclerosis, cancer, inflammatory diseases.           | Immune functions                            | --                                           | (14, 15)         |

**Supplementary Table 12:** Number of detected genes (RPKM>1) per patient, per SQUARE field. Rows are patients and columns are SQUARE fields.

|             |    | 1    | 2    | 3    | 4    | 5     | 6    | 7    | 8    | 9    | 10   | 11   | 12   |
|-------------|----|------|------|------|------|-------|------|------|------|------|------|------|------|
| <b>AD</b>   | 1  | 6152 | 6729 | 6154 | 7224 | 9942  | 6284 | 4273 | 5176 | 6504 | 7879 | 5815 | 7500 |
|             | 2  | 6961 | 6995 | 6251 | 7516 | 9611  | 6478 | 4549 | 5294 | 6698 | 7778 | 6204 | 7747 |
|             | 3  | 6945 | 7107 | 6627 | 7388 | 9746  | 6221 | 4529 | 5037 | 6789 | 7983 | 6145 | 6059 |
|             | 4  | 6811 | 6704 | 6530 | 7555 | 9664  | 6193 | 2877 | 4868 | 6250 | 7976 | 6246 | 8079 |
|             | 5  | 6123 | 6417 | 5848 | 7628 | 9529  | 5953 | 4637 | 4639 | 6140 | 7481 | 5814 | 7654 |
|             | 6  | 6956 | 7093 | 6308 | 7469 | 9927  | 6730 | 4542 | 4951 | 6091 | 7465 | 5699 | 6550 |
|             | 7  | 6310 | 6217 | 5749 | 7176 | 9410  | 5910 | 4393 | 4695 | 6247 | 7203 | 5531 | 7122 |
|             | 8  | 6770 | 6999 | 6436 | 7352 | 9675  | 6730 | 4451 | 5233 | 6761 | 7500 | 6114 | 7589 |
| <b>Con</b>  | 9  | 6374 | 6456 | 5957 | 6785 | 9250  | 6039 | 3889 | 4726 | 6506 | 7182 | 5307 | 6633 |
|             | 10 | 6820 | 6919 | 6083 | 6883 | 9270  | 5950 | 4367 | 4861 | 6763 | 7729 | 5266 | 6545 |
|             | 11 | 5771 | 6029 | 5191 | 6705 | 9445  | 5654 | 4197 | 4565 | 6188 | 6804 | 5649 | 6986 |
|             | 12 | 5660 | 7181 | 6486 | 7208 | 10160 | 7867 | 5148 | 5422 | 6939 | 8082 | 6243 | 6555 |
|             | 13 | 6332 | 6962 | 6220 | 6468 | 9430  | 6576 | 3876 | 5126 | 6959 | 7805 | 5361 | 6657 |
|             | 14 | 6103 | 6486 | 5507 | 7139 | 9583  | 5781 | 4467 | 4604 | 6150 | 7328 | 5632 | 7412 |
|             | 15 | 6380 | 6414 | 5592 | 6486 | 9377  | 5557 | 3940 | 4277 | 6225 | 7869 | 5571 | 7090 |
|             | 16 | 6511 | 6673 | 6217 | 7495 | 9710  | 6147 | 4238 | 4947 | 6788 | 8011 | 5732 | 7296 |
| <b>NDWP</b> | 17 | 6265 | 6450 | 5903 | 7247 | 9142  | 5907 | 4403 | 4718 | 6022 | 7212 | 5424 | 7478 |
|             | 18 | 7153 | 7552 | 6945 | 7596 | 9822  | 6549 | 4382 | 5424 | 7282 | 8388 | 5926 | 7285 |
|             | 19 | 6294 | 5943 | 5668 | 7300 | 9259  | 5648 | 4255 | 4416 | 6108 | 7468 | 5690 | 7321 |
|             | 20 | 6268 | 6583 | 5753 | 7391 | 9732  | 6125 | 4635 | 4815 | 5896 | 7847 | 5733 | 7395 |
|             | 21 | 7674 | 7822 | 6969 | 8201 | 10588 | 7826 | 5027 | 5787 | 7348 | 8095 | 6059 | 7434 |
|             | 22 | 7274 | 7185 | 6793 | 7824 | 9945  | 6982 | 4755 | 5377 | 7258 | 8310 | 6185 | 7737 |
|             | 23 | 7149 | 7073 | 6654 | 7206 | 9895  | 6774 | 4890 | 5274 | 6915 | 8485 | 5796 | 8190 |
|             | 24 | 5676 | 6113 | 5303 | 6938 | 9863  | 6393 | 4630 | 4835 | 6651 | 7721 | 5964 | 6474 |

## Supplementary discussion

### *Sequencing method bias*

This study was based on two distinct sequencing techniques, both aimed at polyadenylated transcripts. The Illumina approach is a single primer-based method, which would amplify the most abundant polyadenylated transcript of any given gene, possibly causing a bias by selecting this more abundant variant while missing the less abundant ones; in comparison, the Lexogen approach involves multiple adenosine-initiated primers addressing all of the optional 3'-polyadenylated versions of such transcripts, which would detect such variabilities but might miss-represent the levels of the more abundant one.

### *APA and lipid changes*



The connection between APA and lipid changes in our study has been driven by data. First, we detected apparent AD-associated changes in the expression levels of those genes known as involved in lipid processing, as is evident from the lipid-related target genes at the top of the list of AD-associated transcripts with altered APA (Table 1). This led us to directly explore the levels of the corresponding lipid molecules, which indeed identified group differences in their composition. However, due to technical limitations, the great majority of modified molecules cannot yet be chemically identified as individual lipids; and those 2400 identifiable lipids that could be individually identified failed to show statistically based correlation with the relevant transcript changes. Finding correlations between APA and specific lipid changes thus depends on progression in the technology of lipid profiling.

#### *One-Way-ANOVA statistical analysis*

We performed One-Way-ANOVA across the three NBB groups, with eight patients each. This is more than the minimum number required for One-Way-ANOVA (one more in a group than the number of groups). One-way ANOVA is considered a robust test against the normality assumption, since it tolerates violations to its normality assumption rather well (see the 'Laerd Statistics' web-site source for statistical guidelines for researchers). We further used the Shapiro-Wilk test for testing normality in our data, and found rather small deviations from normality.

#### **Supplementary References**

1. Altenhoff AM, Skunca N, Glover N, Train CM, Sueki A, Pilizota I, et al. The OMA orthology database in 2015: function predictions, better plant support, synteny view and other improvements. *Nucleic acids research*. 2015;43(Database issue):D240-9.
2. Buchman AS, Leurgans SE, Nag S, Bennett DA, Schneider JA. Cerebrovascular disease pathology and parkinsonian signs in old age. *Stroke*. 2011;42(11):3183-9.
3. Cahoy JD, Emery B, Kaushal A, Foo LC, Zamanian JL, Christopherson KS, et al. A transcriptome database for astrocytes, neurons, and oligodendrocytes: a new resource for understanding brain development and function. *The Journal of neuroscience : the official journal of the Society for Neuroscience*. 2008;28(1):264-78.
4. Darmanis S, Sloan SA, Zhang Y, Enge M, Caneda C, Shuer LM, et al. A survey of human brain transcriptome diversity at the single cell level. *Proceedings of the National Academy of Sciences of the United States of America*. 2015;112(23):7285-90.
5. Song GG, Choi SJ, Ji JD, Lee YH. Genome-wide pathway analysis of a genome-wide association study on multiple sclerosis. *Molecular biology reports*. 2013;40(3):2557-64.
6. Culebras A, Messe SR, Chaturvedi S, Kase CS, Gronseth G. Summary of evidence-based guideline update: prevention of stroke in nonvalvular atrial fibrillation: report of the Guideline Development Subcommittee of the American Academy of Neurology. *Neurology*. 2014;82(8):716-24.

7. Yang XC, Wang X, Luo L, Dong DH, Yu QC, Wang XS, et al. RNA interference suppression of A100A4 reduces the growth and metastatic phenotype of human renal cancer cells via NF- $\kappa$ B-dependent MMP-2 and bcl-2 pathway. *European review for medical and pharmacological sciences*. 2013;17(12):1669-80.
8. Baek SJ, Lee KD, Shen RF. Genomic structure and polymorphism of the human thromboxane synthase-encoding gene. *Gene*. 1996;173(2):251-6.
9. Pich EM, Vargas G, Domenici E. Biomarkers for antipsychotic therapies. *Handbook of experimental pharmacology*. 2012(212):339-60.
10. Demeester N, Castro G, Desrumaux C, De Geitere C, Fruchart JC, Santens P, et al. Characterization and functional studies of lipoproteins, lipid transfer proteins, and lecithin:cholesterol acyltransferase in CSF of normal individuals and patients with Alzheimer's disease. *Journal of lipid research*. 2000;41(6):963-74.
11. Michael GJ, Esmailzadeh S, Moran LB, Christian L, Pearce RK, Graeber MB. Up-regulation of metallothionein gene expression in parkinsonian astrocytes. *Neurogenetics*. 2011;12(4):295-305.
12. Montero-Melendez T, Llor X, Garcia-Planella E, Perretti M, Suarez A. Identification of novel predictor classifiers for inflammatory bowel disease by gene expression profiling. *PloS one*. 2013;8(10):e76235.
13. Leon CA, Schumacher J, Kluck N, Herold C, Schulze TG, Propping P, et al. Association study of the GRIA1 and CLINT1 (Epsin 4) genes in a German schizophrenia sample. *Psychiatric genetics*. 2011;21(2):114.
14. Chabas D, Baranzini SE, Mitchell D, Bernard CC, Rittling SR, Denhardt DT, et al. The influence of the proinflammatory cytokine, osteopontin, on autoimmune demyelinating disease. *Science (New York, NY)*. 2001;294(5547):1731-5.
15. Yumoto K, Ishijima M, Rittling SR, Tsuji K, Tsuchiya Y, Kon S, et al. Osteopontin deficiency protects joints against destruction in anti-type II collagen antibody-induced arthritis in mice. *Proceedings of the National Academy of Sciences of the United States of America*. 2002;99(7):4556-61.
